# Supplementary material
Source: Springer Nature journal article supplement (https://www.springermedizin.de/resource/supplementary/12967_2014_1863_MOESM2_ESM.pdf/9575014)
Supplement: MOESM2 [file 9575014]

# CHILDREN

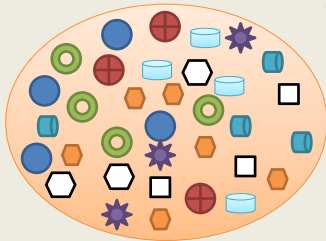

- Obese 15-20%
- ⊕ Obese OSA 5-7%
- Obese CVD 5%
- ▧ Obese OSA/CVD 3-4%
- ▩ Non-Obese 80-85%
- ⬡ Non-obese OSA 2-4%
- Non-obese CVD 0.1-0.4%
- ★ Non-obese CVD/OSA 1-1.5%

## EXOSOMES

CVD (+)

CVD (-)

mRNA  
miRNA  
Lipid  
Protein

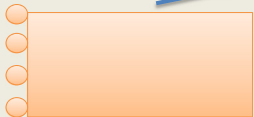

mRNA  
miRNA  
Lipid  
Protein

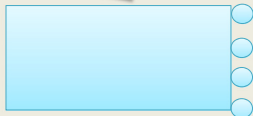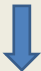

## BIOMARKERS

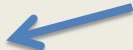

DIAGNOSTICS

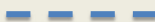

THERAPEUTICS
